# The Functional Connectivity between the Locust Leg Pattern Generating Networks and the Subesophageal Ganglion Higher Motor Center

1 Daniel Knebel<sup>†1,2</sup>, Jan Rillich<sup>†1,3</sup>, Leonard Nadler<sup>4</sup>, Hans-Joachim Pflueger<sup>4</sup> and  
2 Amir Ayali<sup>1,2\*</sup>

3  
4 <sup>1</sup>Department of Zoology, Tel Aviv University, Tel Aviv, Israel.

5 <sup>2</sup>Sagol School of Neuroscience, Tel Aviv University, Tel Aviv, Israel.

6 <sup>3</sup>Institute for Biology, University of Leipzig, Leipzig, Germany.

7 <sup>4</sup>Institut für Neurobiologie, Freie Universität Berlin, Berlin, Germany.

8  
9  
10  
11 <sup>†</sup> These should be considered joint first author

12  
13  
14  
15 \* Author for Correspondence:

16 Amir Ayali

17 [ayali@post.tau.ac.il](mailto:ayali@post.tau.ac.il)

## 18 19 Acknowledgements

20 This work was partially supported by DAAD travel scholarships (to DK) and, in its final  
21 stages, by the German Research Council (DFG; Grant RI 2728/2-1). H-J P gratefully  
22 acknowledges the support by the DFG (FOR 1363, Pf128/30-1 and PF128/32-1) and the  
23 receipt of a Berlin NaFoeG-stipend to LN. We thank Baruch Barzel for his valuable  
24 support in the data analysis.

25  
26  
27  
28 The authors declare no conflict of interests

29

30 **Abstract**

31 Interactions among different neuronal circuits are essential for adaptable  
32 coordinated behavior. Specifically, higher motor centers and central pattern generators  
33 (CPGs) induce rhythmic leg movements that act in concert in the control of locomotion.  
34 Here we explored the relations between the subesophageal ganglion (SEG) and thoracic  
35 leg CPGs in the desert locust. Backfill staining revealed about 300 SEG descending  
36 interneurons (DINs) and some overlap with the arborization of DINs and leg motor  
37 neurons. In accordance, in *in-vitro* preparations, electrical stimulation applied to the SEG  
38 excited these neurons, and in some cases also induced CPGs activity. Additionally, we  
39 found that the SEG regulates the coupling pattern among the CPGs: when the CPGs were  
40 activated pharmacologically, inputs from the SEG were able to synchronize contralateral  
41 CPGs. This motor output was correlated to the firing of SEG descending and local  
42 interneurons. Altogether, these findings point to a role of the SEG in both activating leg  
43 CPGs and in coordinating their oscillations, and suggest parallels between the SEG and  
44 the brainstem of vertebrates.

45

46

47 **Keywords:** locomotion, locust, insect, subesophageal ganglion, central pattern generator  
48 (CPG), intersegmental coordination

49

## 50 **Introduction**

51 A longstanding and fundamental question in neuroscience is that of how the brain  
52 coordinates motor behaviors (Penfield and Boldrey, 1937; Schmidt and Lee, 2005;  
53 Fritsch and Hitzig, 2009). Ample research across species and methodologies has revealed  
54 a differentiation between three levels of motor control: central pattern generators (CPGs -  
55 neuronal oscillators that can produce rhythmic motor output in the absence of sensory or  
56 descending inputs; see recent reviews in Marder and Bucher, 2007; Mulloney and  
57 Smarandache, 2010; Marder, 2012; Rybak et al., 2015); sensory feedback; and higher  
58 motor centers. In most cases, the CPGs determine rhythmic alternating activity of specific  
59 antagonistic muscles. The CPGs by themselves, or often together with a few of the many  
60 sensory feedback loops in intact animals, are sufficient for the generation of coordinated  
61 motor patterns (e.g. Bal et al., 1988; Stevenson and Kutsch, 1987). Higher motor centers,  
62 on the other hand, have a wide-ranging influence, affecting various body parts  
63 concurrently. They may select the appropriate behavior, initiate it, and orchestrate it. To  
64 this end, higher motor centers form functional connections with CPGs and may modulate  
65 different ones simultaneously. This report describes the interplay between leg CPGs and  
66 subesophageal ganglion (SEG), which serves as a higher motor center for locomotion  
67 (Gal and Libersat, 2006; Kaiser and Libersat, 2015; Tastekin et al., 2015), of the desert  
68 locust, *Schistocerca gregaria* (Forskål).

69 A comprehensive body of work describing the interactions between higher motor  
70 centers and CPGs in the tadpole largely inspired our current work, which shares similar  
71 aims with it. Each of the tadpole's spinal cord segments includes two CPGs that produce  
72 an alternating rhythmic motor output, activating the myotomal muscles and thus inducing  
73 stereotypic swimming movements (Kahn and Roberts, 1982a). These segmental circuits  
74 reciprocally inhibit each other, while maintaining a phase difference between the activity  
75 of consecutive segments, thus producing the longitudinal directionality of the movement  
76 (Kahn and Roberts, 1982a; b). However, when the spinal cord is isolated from the  
77 hindbrain, only short fictive swim bouts can be generated (Li et al., 2006). Further  
78 research into these findings revealed that in addition to the spinal network of CPGs,  
79 another rhythm-generating center resides in the hindbrain, consisting of electrically  
80 coupled descending interneurons (DINs), which are active before each cycle of the spinal

81 motor output, and drive the spinal CPGs (Li et al., 2006, 2009, 2010; Soffe et al., 2009).  
82 Similarly, studies in mice and lampreys have pointed to an instrumental role of the brain  
83 stem in locomotion (McClellan and Grillner, 1984; Dubuc et al., 2008; Gordon and  
84 Whelan, 2008; Hägglund et al., 2010).

85 To date, the study of higher locomotion centers in insects has mostly focused on  
86 their behavioral role *in-vivo*. Using lesions, genetic techniques, and electrophysiological  
87 recordings, certain areas of the insect supraesophageal ganglion (brain), such as the  
88 central complex and mushroom bodies, were shown to control advanced aspects of  
89 walking: for example, speed change and turning (e.g. Strauss, 2002; Gal and Libersat,  
90 2006; Poeck et al., 2008; Bender et al., 2010; Guo and Ritzmann, 2013). The SEG, which  
91 anatomically resides between the brain and the thoracic ganglia, was considered  
92 responsible for more basic features of walking such as initiation, maintenance, and  
93 forward-backward orientation (Huber, 1960; Kien and Altman, 1984; Bässler et al., 1985;  
94 Kien, 1990a; Gal and Libersat, 2008; Bidaye et al., 2014). In accordance, lesion-based  
95 experiments have demonstrated that removal of the brain does not abolish spontaneous  
96 walking, whereas the removal of the SEG eliminates it (Kien and Williams, 1983; Gal  
97 and Libersat, 2006). Our knowledge of the anatomical and moreover functional  
98 connections between the SEG and leg CPGs is, however, still incomplete.

99 In accord with previous studies that found central connections between the locust  
100 limbs (e.g. Berkowitz and Laurent, 1996), we have recently offered a detailed description  
101 of the functional connections among the inter-leg coxa-trochanteral CPGs in the locust  
102 *in-vitro* (Knebel et al., 2017). We showed that each of the three thoracic ganglia has its  
103 own default, inherent, bilateral coupling of these CPGs: in-phase within the pro- and  
104 mesothoracic ganglia, and anti-phase in the metathoracic ganglion. Furthermore, each  
105 ganglion was found to be capable of imparting its coupling scheme onto the other  
106 ganglia. Importantly, as in most walking systems (Büschges et al., 2011), none of the  
107 observed *in-vitro* inter-leg coordination schemes resembled a functional walking gait, and  
108 specifically not the tripod gait common among insects, in which neighboring pairs of legs  
109 show antiphase activity (Wilson, 1966; Grabowska et al., 2012). The thoracic network of  
110 oscillators must, therefore, feature inherent flexibility in order to establish a functional  
111 walking gait.

112 In the current report we follow-up on this work, taking advantage of the locust's  
113 easily accessible nervous systems, as well as its anatomical modularity, i.e. the functional  
114 and anatomical separation of the leg CPGs, compartmented by the three interconnected  
115 segmental thoracic ganglia; and the higher locomotion centers, encompassed in the two  
116 head ganglia – the brain and SEG (or gnathal ganglia; Ito et al., 2014). We introduce first  
117 evidence of leverage points for central regulation of the leg CPG network by the SEG  
118 higher motor center.

## 119 **Materials and Methods**

### 120 **Experimental animals**

121 All experiments were performed on adult male desert locusts (*Schistocerca*  
122 *gregaria*) from our colony at Tel Aviv University (Ayali and Zilberstein, 2002), within  
123 the first two weeks after the final molt. All experiments complied with the Principles of  
124 Laboratory Animal Care and the Israeli Law regarding the protection of animals.

### 125 **Preparation**

126 Recordings were conducted from *in-vitro* ventral nerve chord preparations,  
127 including the pro-, meso- and metathoracic ganglia, and the SEG. Prior to dissection, the  
128 animals were anesthetized with CO<sub>2</sub> for at least 5 min. Following removal of the brain  
129 (decerebration), appendages, the pronotal shield, and the abdomen posteriorly to the  
130 fourth abdominal segment, a longitudinal cut was performed in the cuticle along the  
131 dorsal midline of the thorax. The preparation was pinned to a Sylgard dish (Sylgard 182  
132 silicon Elastomer, Dow Corning Corp.), and the cut was widened and superfused with  
133 locust saline containing (in mM): 150 NaCl, 5 KCl, 5 CaCl<sub>2</sub>, 2 MgCl<sub>2</sub>, 10 Hepes, 25  
134 sucrose at pH 7.4. Air sacs and fatty tissue covering the ventral nerve cord were removed,  
135 and the thoracic ganglia chain and SEG with their surrounding tracheal supply were  
136 dissected out of the animal body, pinned in a clean Sylgard dish, dorsal side up, and  
137 bathed in locust saline. The two main tracheae were opened and floated on the saline  
138 surface. All peripheral nerve branches originating from the thoracic ganglia were cut  
139 short except for the N5a nerves (numbered after Campbell, 1961), which each contain

140 three motor axons: the slow and fast trochanteral depressors and a common inhibitor (Fig.  
141 1; Ds, Df, and CI respectively).

## 142 **Electrophysiology and neuroanatomy**

143 To test the effect of SEG electrical stimulation on the thoracic motor output, trains  
144 of short electrical pulses (200 ms of 250 Hz pulses of 0.5 ms each, 1 V) were delivered to  
145 different areas of the SEG by carefully-fashioned insulated platinum-iridium electrodes,  
146 with especially high resistance and small tip diameter (15  $\mu\text{m}$ ), as described by Hussaini  
147 and Menzel (2013). Thus, we limited the stimulated area as much as possible. All  
148 electrical stimulations were generated by a Master 8 stimulator (A.M.P.I).

149 The activity of the motor nerves (N5a) of each thoracic ganglion was extracellularly  
150 recorded by suction electrodes made of borosilicate glass capillaries (A-M systems) and  
151 pulled with a P87 puller (Sutter Instruments). Unipolar hook electrodes were used to  
152 monitor inter-segmental information transfer from the inter-ganglia connectives (SEG-  
153 pro, pro-meso, meso-meta). Data were acquired using two four-channel differential AC  
154 amplifiers (Model 1700, A-M Systems).

155 For intracellular recordings, the SEG neurons were impaled with borosilicate glass  
156 capillaries pulled with the P87 puller. The electrode tips were filled with 3 % Neurobiotin  
157 (Vector Laboratories, Inc.) diluted in 3M potassium acetate and the shafts with  
158 3M potassium acetate alone, leaving a small air bubble in between. These electrodes had  
159 a resistance of approximately 60 M $\Omega$ . In order to penetrate the ganglion sheath, a few  
160 crystals of protease (Sigma-Aldrich) were placed on the ganglion for 30 s. Intracellularly  
161 recorded signals were amplified using a DC amplifier (Axoclamp-2B, Molecular  
162 Devices). All recordings were digitized (Axon Digidata 1440A A-D board) and stored on  
163 a computer using standard software (Axo-Scope software; Molecular Devices). Resting  
164 membrane potentials for all intracellular recordings shown were below -65 mV. After  
165 evaluating the responses to restricted drug application, the intracellularly recorded neuron  
166 was labeled by iontophoretic injection of Neurobiotin using depolarizing current pulses  
167 (2 nA; 100 ms; 5 Hz; 20-40 min).

168 Backfill staining was accomplished by cutting the desired nerve and bathing it in  
169 Dextran-Rhodamine (Molecular probes) or Neurobiotin. After intracellular labeling or

170 backfill staining, preparations were placed for 24 h in a moisture chamber at 4°C to allow  
171 the tracer to diffuse along the neurons. Thereafter, the nerve chord was fixed for 2-4 h in  
172 3% paraformaldehyde. The ganglia sheaths were permeabilized with a 0.1%  
173 collagenase/dispase (Sigma-Aldrich) solution for 30 min at 36°C before the Neurobiotin  
174 labeling was visualized by streptavidin-Cy3 (Jackson ImmunoResearch Labs). Finally,  
175 the ganglia chain was dehydrated in an ethanol series and cleared in methyl-salicylate  
176 (Merck KGaA). The whole-mount preparations were scanned with a confocal microscope  
177 (either ZEISS LSM 510, Carl Zeiss, or LEICA TCS SP2, Leica). Neurons were  
178 reconstructed from confocal image stacks using Fiji software  
179 (<http://fiji.sc/wiki/index.php/Fiji>).

## 180 **Pharmacological treatment**

181 The muscarinic receptor agonist pilocarpine hydrochloride (Sigma-Aldrich, St  
182 Louis, MO, USA) was dissolved in locust saline to a final concentration of 0.5 mM,  
183 which typically elicits rhythmic motor activity in leg motor nerves (e.g. Ryckebusch and  
184 Laurent, 1993). After 5 min in normal saline, the pilocarpine solution was restrictively  
185 bath-applied to the metathoracic ganglion, which was isolated from the rest of the ventral  
186 nerve cord by surrounding it with a petroleum jelly (Vaseline) wall. All other thoracic  
187 ganglia and the SEG were bathed in normal saline. The well was carefully leak proofed  
188 by applying saline, first only to the surrounding of the well, then into the well only, and  
189 checking for leaks from the well walls.

## 190 **Data analysis**

191 The pilocarpine-induced motor activity in the thoracic ganglia was measured in 31  
192 experiments, initially with the SEG intact and subsequently again after disconnecting the  
193 SEG. In each experiment between three to seven simultaneous recordings were conducted  
194 from the leg depressor motor neuron (MN) pools, including the slow and fast trochanteral  
195 depressors and common inhibitor (Fig. 1; Ds, Df, and CI respectively). Spikes were  
196 detected and identified based on their amplitude, and only activity of the excitatory MNs  
197 was taken into account, without separating between the Ds and Df. Additionally, in some  
198 of the experiments the activity of the inter-ganglia connectives and SEG interneurons was

199 also monitored. We routinely evaluated the activity in two subsequent 8 min windows:  
200 the first, typically after 22 min post drug application, and the second immediately after  
201 the neck connectives were cut.

202 To identify SEG DINs in the connective recordings, spikes were first identified  
203 using a template recognition function (Dataview software, University of St. Andrews) in  
204 one of the channels. Subsequently, we overlaid all identified spikes in 20 ms windows by  
205 aligning their maximum point. We repeated this process for the parallel time windows in  
206 the other connectives recordings, and averaged each of the overlays. This allowed us to  
207 examine the typical activity before and after the identified spike in the more rostral and/or  
208 caudal connective recordings. Based on a typical axonal conduction speed of 2 m/s  
209 (Gray and Robertson, 1998), and a distance of 3-5 mm between each pair of electrodes,  
210 we expected DINs spikes to appear at a delay of about 1.5-2.5 ms between electrodes  
211 monitoring adjacent ipsilateral connectives, from rostral to caudal. Spikes that were not  
212 accompanied by such preceding or delayed activity in adjacent connectives were filtered  
213 out. In one experiment, we used hook electrodes to record both neck connectives and to  
214 identify simultaneous bilateral descending spikes. After verifying that the spike was  
215 descending (as described above), we selected only simultaneous spikes in both  
216 connectives.

217 To characterize the phases between the output of pairs of CPGs, we used cross-  
218 spectrum analysis in MATLAB (MathWorks Inc.), following a procedure developed by  
219 Miller and Sigvardt, (1998; see also Sigvardt and Miller, 1998). Only significantly  
220 coherent frequencies of each pair of recordings were used to calculate each experiment  
221 mean phase vector. The Watson–Williams F-test was used to test for differences in the  
222 phase vectors. In order to combine both the uniformity and directionality of the phase  
223 distributions, we used the synchronization index, ranging from -1, perfect anti phase, to  
224 +1, perfect in phase. This was calculated by averaging all the experiments mean phase  
225 vectors, and projecting the product on the 0-180 axis (see Knebel et al., 2017 for more  
226 details on the cross-spectrum and synchronization index).

227 In order to compare the SEG neuronal output and the activity of thoracic MN pools,  
228 we utilized cross-covariance analysis in MATLAB. We used a smoothed on-time vector  
229 of the spikes of each of the simultaneous recordings. It should be noted that the resultant



230 covariance coefficient value was normalized in order to be able to compare between  
231 different analyses. The coefficient is valid only relatively as it is highly dependent on the  
232 prior smoothing process: the change of the coefficient over time represents the relative  
233 likelihood of spikes to occur in different temporal circumstances, and can be compared  
234 among the different examples presented that went through the exact same process.

235 We tested the statistical significance of the obtained covariance coefficients by  
236 performing the exact same analysis on 1000 randomly chosen pairs of the motor output  
237 recordings, in which each recording came from a different experiment (different locust).  
238 Thereby, we could calculate a bootstrap which represented a confidence interval of 95%,  
239 which defined the range of covariance coefficients that could be obtained by chance  
240 (<95%). The extreme values of the bootstrap were 1.11 and -0.968. Thus, any result that  
241 crosses these have less than a 5% chance of being a type 1 error, and therefore can be  
242 considered statistically significant. All the results which are mentioned as meaningful  
243 crossed this threshold, unless noted otherwise.

244 To merge the cross-covariance of the activity of two MN pools and SEG neuronal  
245 activity, we multiplied the two normalized cross-covariances calculated separately for  
246 each MN pool against the SEG neuronal activity. This yielded a square matrix, in which  
247 the axes represent the lags of each cross-covariance. Thus, the diagonal axis (from  
248 bottom left to top right) depicts the on-time correlation of the MN pool in respect to the  
249 SEG activity, while any deviation from this line indicates the correlation value at a  
250 certain time-lag. Again, the absolute values of this analysis are relative, but can be  
251 compared among themselves to show the tendency of firing at different temporal states of  
252 the network.

## 253 **Results**

254 All electrophysiological experiments (N=40) were performed on isolated ventral  
255 nerve cords of the locust, including the SEG and the three thoracic ganglia. In all, we  
256 evaluated the activity of the coxa-trochanteral CPGs, which induce alternated motor  
257 output between the leg levator and depressor motor neuron pools (Ryckebusch and  
258 Laurent, 1993; Rillich et al., 2013; Knebel et al., 2017). Based on this robust motor  
259 pattern, we measured the activity of trochanteral depressor MNs as representatives of the

260 leg motor output, which participate, among others, in the stance phase during stepping.

261

### 262 **The DINs deliver the SEG descending control of the thoracic motor centers**

263 The SEG higher motor center commands are delivered downstream to the  
264 peripheral motor center via a set of DINs (Kien, 1990a; b; Kien et al., 1990; Gal and  
265 Libersat, 2006). We performed three experiments in which we stained one neck  
266 connective, and found 146, 153, and again 153 stained neuronal somas in the SEG  
267 (example: Fig. 1A). Therefore, assuming symmetry, and taking into account the few  
268 neurons that send descending neurites in both connectives, there are almost 300 SEG  
269 DINs (in accordance with Kien et al., 1990). To explore the anatomical relations between  
270 the head ganglia DINs and the leg depressor MNs, we performed a double labeling of the  
271 metathoracic N5a nerves and one neck connective. This revealed that many DIN  
272 projections overlap with the arborization area of the N5a neurons, both ipsilaterally to the  
273 stained connective and contralaterally (Fig. 1B and C). We could not determine whether  
274 the DINs originate in the brain or the SEG, or whether they form synapses with the motor  
275 neurons. However, the overlapping between DINs' projections and the leg motor neurons  
276 are consistent with the previously reported functional connections, both for the SEG  
277 DINs (cockroach: Gal and Libersat, 2008; locust: Kien, 1983; Kien and Altman, 1984)  
278 and the brain DINs (cockroach: Bender et al., 2010; Mu and Ritzmann, 2008; Ridgel and  
279 Ritzmann, 2005).

### 280 **The intact SEG fails to induce activity in the thoracic ganglia chain**

281 Previous studies have shown that headless insects, lacking both the supra- and  
282 subesophageal ganglion, do not engage in spontaneous walking, and upon tactile  
283 stimulation walk only briefly. However, when the SEG was left intact, the insects tended  
284 to walk spontaneously and often uninhibitedly, without any additional stimulation (e.g.  
285 stick insect: Bässler, 1983; locust: Kien, 1983; cockroach: Gal and Libersat, 2006).  
286 Accordingly, several studies have also reported that without the SEG the leg CPGs are  
287 inherently inactive *in-vitro* (Knebel et al., 2017 and references within). Therefore, we

288 first explored whether the intact SEG induces spontaneous fictive leg motor activity in  
289 the *in-vitro* thoracic ganglia chain preparations.

290 In all experiments (N=40) the pro- and mesothoracic ganglia depressor MN pools  
291 were silent, whereas the meta-thoracic slow depressor was tonically firing (examples:  
292 Fig. 1D and E before the stimulus; see also Knebel et al., 2017; Rillich et al., 2013). No  
293 spontaneous motor bursts of action potentials were evident in any of the recordings.

294 **Stimulation of the SEG labial neuromere is sufficient for generating leg CPGs**  
295 **activity *in-vitro***

296 Extracellular electrical stimulation of the SEG was previously reported to evoke  
297 bouts of walking in semi-intact locusts (Kien, 1990a). Following this report, we sought to  
298 explore the effect of electrical stimulation to the SEG *in-vitro*. A pair of fine electrode  
299 was positioned into the SEG by way of a micromanipulator, and trains of short electrical  
300 pulses were applied, while the thoracic motor output was recorded. Due to the easy  
301 accessibility of the isolated preparation, we were able to direct the stimulating electrode  
302 to any of the three SEG neuropiles (the mandibular, maxillar, and labial neuromeres,  
303 from rostral to caudal). Furthermore, we were able to position the electrode in an area  
304 very close to the SEG longitudinal midline, and together with the high resistance small  
305 tip electrode used, the possible stimulation of the lateral tracts, in which most axons of  
306 brain DINs run directly to the ventral nerve cord, was limited.

307 Short electrical stimulations were delivered to 2-3 of the SEG neuromeres in four  
308 animals. Each trial consisted of 10 stimulations at intervals of 30 sec. In all experiments,  
309 a motor response in at least one thoracic ganglion was recorded. However, stimulation of  
310 the different neuromeres evoked different motor outputs: The mandibular and maxillar  
311 stimulations resulted in short responses (example of a mandibular stimulation: Fig. 1D;  
312 overall medians: mandibular 1.4 sec and maxillar 4.1 sec), whereas the labial stimulation  
313 elicited prolonged activity with an overall median of 22.9 sec. Moreover, stimulation of  
314 the labial neuromere elicited rhythmic bursting activity of up to six bursts, in 2-4 of the  
315 recorded thoracic leg CPGs (example: Fig. 1E).

316 Rhythmic bursting activity in a sensory-deprived preparation is necessarily the  
317 product of CPG activation. Our findings thus indicate that the labial neuromere of the

318 SEG is sufficient to activate the leg CPGs in all three thoracic ganglia. Interestingly,  
319 during all the *in-vitro* labial neuromere stimulations we observed prothoracic bilateral  
320 synchronized excitation, whereas coupling patterns among the other recorded nerves  
321 were varied (example: Fig. 1E).

### 322 **The SEG has no effect on specific bursting properties of the leg CPGs**

323 The muscarinic agonist pilocarpine is known to activate leg CPGs in isolated  
324 nervous systems of arthropods (Chrachri and Clarac, 1987; Ryckebusch and Laurent,  
325 1993, 1994; Ryckebusch et al., 1994; Büschges et al., 1995; Johnston and Levine, 2002;  
326 Fuchs et al., 2011, 2012; Rillich et al., 2013; David et al., 2016). Recently, we  
327 demonstrated that applying pilocarpine restrictively to each of the thoracic ganglia is  
328 sufficient for inducing activity in all leg CPGs, including those of the untreated ganglia  
329 (Knebel et al., 2017). To explore a tentative effect of the SEG on the CPG-CPG  
330 interactions, we activated the thoracic CPGs by applying pilocarpine to the metathoracic  
331 ganglion alone in an *in-vitro* preparation, and compared the motor output of the different  
332 depressor MN pools both with the SEG intact and following its removal. Thus, while the  
333 generation of rhythmicity arose from the caudal end of the ganglia chain, any SEG  
334 modulatory influence had to be sent from the rostral end (pictogram: Fig. 2A).

335 Following pilocarpine application, rhythmic motor patterns were obtained in all  
336 thoracic ganglia within 2-5 min (Fig. 2A). Before analyzing the coordination pattern  
337 among the bursts of the different hemiganglia, we examined whether the SEG influences  
338 the general properties of each CPG activity. To this end, we compared the spike  
339 frequency in each recording, before and after SEG removal, and found no significant  
340 change (Fig. 2B; N=31). We further examined the influence of the SEG on the CPGs  
341 recruitment to the pharmacologically activated metathoracic CPGs; as only the  
342 metathoracic ganglion was directly exposed to pilocarpine, all other CPG activity resulted  
343 from activation of its CPGs. Therefore, the frequencies of the metathoracic CPGs and the  
344 other CPGs should resemble each other (i.e. share a common frequency). Using the cross-  
345 spectrum analysis, we tested whether the common frequencies differed with and without  
346 the SEG (Fig. 2C). We found no effect of the SEG removal on the most common  
347 frequencies in the meta-prothoracic and meta-mesothoracic bursting activity (N=31), and

348 therefore concluded that the SEG does not affect the frequency-entrainment of the rostral  
349 CPGs by the caudal metathoracic source of rhythmicity. Additionally, we found no SEG  
350 effect on the shared frequencies between the two contralateral metathoracic CPGs.  
351 Therefore, the SEG has no influence on the rhythmicity of the CPG network.

### 352 **The SEG modulates phase parameters among the CPGs**

353 As noted, we have recently reported that in *in-vitro* preparation, when pilocarpine  
354 was applied onto the metathoracic ganglion only, all the ganglia bilateral CPGs oscillate  
355 in antiphase while the ipsilateral CPGs are synchronized (Knebel et al., 2017). Here we  
356 further explored whether the SEG is able to affect this coordination pattern. To this end,  
357 we used the synchronization index to determine the synchrony level between each couple  
358 of oscillators in our experiments (see Methods for details).

359 In line with our previous results, when the metathoracic ganglion was directly  
360 activated with pilocarpine and the SEG was intact, all ipsilateral CPGs fired bursts of  
361 action potentials in-phase. However, unlike in our previous report, in the presence of the  
362 SEG the bilateral CPG also oscillated and fired in-phase (Fig. 3C). After removing the  
363 SEG, while the ipsilateral CPGs oscillations remained synchronized, the activity of the  
364 contralateral CPGs shifted towards anti-phase (Fig. 3D), similar to that recorded in our  
365 previous report (where the SEG was removed at the dissection stage; Fig. 3E). Most  
366 prominent was the change in the prothoracic ganglion CPGs, whose synchronization  
367 index significantly dropped from 0.61 to -0.24 following SEG removal.

368 Taken together, the SEG synchronizes the activity of the two lateral sides of the  
369 CPG network, without affecting the capacity for frequency entrainment and the burst  
370 properties of the CPG network.

### 371 **Candidate SEG interneurons participate in the bilateral synchronization**

372 To explore the underlying neuronal circuitry behind the bilateral synchronizing  
373 effect of the SEG, we simultaneously recorded the CPG motor outputs and the inter-  
374 ganglia connectives. Based on multiple connective recordings (example: Fig. 2A) and  
375 subsequent spike sorting, we were able to extract the activities of single SEG DINs.  
376 Figure 4A-D presents an example of such SEG DIN activity. The cross-covariance

377 analysis shows that this DIN activity was correlated with the firing of the two bilateral  
378 MN pools in the prothoracic ganglion: that ipsilateral to the connectives recorded, and  
379 that contralateral to them (Fig. 4B). The correlation of the DIN with the latter showed a  
380 slight but consistent delay. This difference is visualized in the merged cross-covariance  
381 shown in Fig. 4D, where the blue spot, representing a higher correlation between the ipsi-  
382 and contralateral prothoracic MN pools in relation to the DIN firings, is smeared towards  
383 the positive values of the contralateral prothoracic axis. Since the cross-covariance  
384 between the DIN and the metathoracic CPG did not reveal a temporal relationship  
385 between their activities (Fig. 4B, green line), this DIN activity is correlated to the activity  
386 of specific CPGs.

387 By means of intracellular recordings we obtained further insights into the activity  
388 of SEG interneurons during the metathoracic pilocarpine-induced rhythm. Figure 4E  
389 presents an example of a SEG DIN recording. This cell's activity resembled that of the  
390 DIN described above, as can be seen in the cross-covariance analysis: correlated activity  
391 with both pro-thoracic MN pools, with a slight difference in the shape of the correlation  
392 over time, and only weaker correlation with the metathoracic MNs (Fig. 4F). The  
393 recording exhibits rather small action potentials and robust changes in the membrane  
394 potential, indicating soma rather than axonal recordings. Hence, to correlate this DIN  
395 activity with the prothoracic motor output, we used the values of the membrane potential  
396 (and not only the spike on-times).

397 The two examples presented above demonstrate correlations between the output of  
398 both of the prothoracic hemiganglia and an SEG DIN. However, in both cases, the left  
399 and right CPGs were rather synchronized even irrespective of the DIN activity (Fig. 4C  
400 and G), and it is impossible to distinguish whether the DINs' activity was connected to  
401 one or both the prothoracic CPGs. Therefore, we further analyzed the findings from other  
402 experiments, in which the CPG-GPG correlation was lower. Figure 4I presents an  
403 example of an intracellular recording of an SEG interneuron in a preparation, in which  
404 the prothoracic bilateral synchronization was relatively small (Fig. 4K). Nonetheless,  
405 each of the prothoracic CPGs showed correlation with the SEG interneuron (Fig. 4J).  
406 Moreover, the merged cross-covariance visualizes the small time window, in which the  
407 SEG interneuron was correlated with both prothoracic CPGs (Fig. 4L), in contrast to the

408 overall low bilateral correlation. These findings suggest that this SEG neuron interacts  
409 with both prothoracic MN pools.

### 410 **SEG descending dorsal unpaired median (DUM) neurons interact with the** 411 **CPG network**

412 The coupling between independent CPGs can be modulated by neuromodulators  
413 such as the biogenic amine octopamine (e.g. Rand et al., 2012; Rillich et al., 2013). To  
414 determine whether octopaminergic SEG neurons are centrally coupled to the leg CPGs  
415 and are possibly involved in their synchronization, we aimed at specifically recording the  
416 octopaminergic SEG DUM neurons.

417 Due to their unique bilateral descending neurites (Kien et al., 1990; Bräunig, 1991;  
418 Cholewa and Pflüger, 2009), we were able to identify the DUM neurons' activity by  
419 recording from both neck connectives, and from the pro-meso connective simultaneously  
420 (see Methods for details; Fig. 5A; the different spike amplitudes seen in the left and right  
421 connectives in this example is probably a result of different positions of the hook  
422 electrode on the two connectives;). Repeating the cross-covariance analysis for this DUM  
423 neuron and the two prothoracic CPGs indeed revealed a relatively strong correlation  
424 among the activity of all three (Fig. 5B and D). In this example, again, the correlation of  
425 each of the prothoracic CPGs with the DUM neuron exceeded the correlation between  
426 both CPGs (Fig. 5C).

427 Additionally, we intracellularly recorded from a SEG DUM neuron as confirmed by  
428 its labeling and action potentials (Fig. 6A): the neuron had a large soma of about 45  $\mu\text{m}$   
429 in diameter, was located medially on the dorsal posterior side of the SEG, and had a  
430 symmetrical arborization pattern in the SEG, similar to those described by Bräunig  
431 (1991; see also Kien et al., 1990 and Bräunig and Burrows, 2004). Furthermore, its action  
432 potentials were long lasting (~3.5 ms; Fig. 6B), and its soma was excitable (Fig. 6F), as  
433 typical for DUM neurons (soma spikes: Heidel and Pflüger, 2006). Similar to the DUM  
434 neuron identified by recording the connectives spikes (Fig. 5), this neuron's action  
435 potentials showed a tendency to be synchronized with the output of both prothoracic  
436 CPGs (The correlation was statistically significant only with the left nerve recording),  
437 while the activity of the CPGs themselves was not correlated (Fig. 6C and D).

438           In order to uncover the postsynaptic potentials (PSPs) that this neuron receives, we  
439 hyperpolarized it for several minutes and thus minimized the action potentials generated.  
440 We found that the DUM neuron received accurate and consistent information about co-  
441 activation of the two prothoracic CPGs (example: Fig. 6G; analysis: Fig. 6H). Since the  
442 DUM neuron EPSPs indicate synchrony between the bilateral CPGs, they might offer a  
443 mean of coincidence detection. Interestingly, during the period of hyperpolarization, the  
444 synchronization among the prothoracic CPGs noticeably increased (Fig. 6I).  
445 Depolarization, on the other hand, did not evoke any immediate response (Fig. 6F).

446

## 447 **Discussion**

448           In this study we have demonstrated two major aspects of functional interactions  
449 between the higher locomotion centers of the SEG and the leg CPGs in the locust: (1) the  
450 ability of the SEG to induce CPG activity, and (2) the role of the SEG in coordinating the  
451 coupling among the leg CPGs. These interactions are mediated by the SEG DINs,  
452 connecting the SEG with the thorax.

### 453 **The use of *in-vitro* preparations**

454           All the experiments presented here were conducted *in-vitro*. As previously  
455 explained in Knebel et al. (2017), and as a common working hypothesis in CPG research  
456 (e.g. Ayali and Lange, 2010 for review), it is advantageous to study the central interplay  
457 of CPGs in the complete absence of sensory inputs. This reductionist approach is  
458 consistent with the very definition of CPGs as a neuronal oscillator capable of performing  
459 its tasks with no sensory regulation (Marder and Bucher, 2001). However, there are also  
460 some clear limitations to this approach: namely, that conclusions, valid at the level of the  
461 neuronal network and nervous system, may not be directly reflected in the actual  
462 behavior, which is further shaped by additional sources, such as sensory inputs and the  
463 animal's internal state, in the intact animal. Nonetheless, it is important to note that since  
464 the central connections and interactions we studied here *in-vitro* are those underlying the  
465 execution of the motor behavior, the insights gained *in-vitro* are instrumental for the



466 generation of hypotheses and predictions regarding *in-vivo* insect locomotion.

### 467 **The SEG's ability to initiate different activity patterns in leg CPGs**

468 By means of electrical stimulation of SEG neurons we were able to activate each of  
469 the leg coxa-trochanteral CPGs. This finding, obtained in the isolated *in-vitro*  
470 preparation, indicates the sufficiency of the central connections between the SEG and the  
471 thoracic ganglia in activating the leg CPGs. Moreover, of the three SEG neuromeres,  
472 overall containing approximately 300 SEG DINs (Fig. 1A; see also Kien et al., 1990), we  
473 identified the labial neuromere as the most potent SEG area for CPG activation. Labial  
474 neuromere excitation induced prolonged bursting rhythms, similar to those obtained by  
475 activating the leg CPGs pharmacologically (compare examples in Fig. 1E and Fig. 2A;  
476 see also Knebel et al., 2017). These results are in accord with those reported by Kien  
477 (1983), as well as with our own preliminary experiments (not described herein), showing  
478 that stimulating the SEG in a semi-intact preparation results in leg movements (suppl.  
479 videos 1&2). Altogether, these findings suggest that the SEG is capable of inducing leg  
480 CPGs activity, and thus initiating stepping behavior. Moreover, they also suggest that by  
481 providing rhythmical excitatory and inhibitory signals to the leg CPGs, the SEG can  
482 maintain ongoing legged activity, as was previously suggested by Kien and Altman  
483 (1992). However, we also observed that intact connections to the unstimulated SEG were  
484 not sufficient by themselves to initiate spontaneous leg motor activity. It therefore seems  
485 that rather than constituting an autonomous “motivation center”, the SEG functions as a  
486 relay station or a mediator, and depends on central inputs from the brain, from other  
487 CPGs, or on sensory information, in order to drive leg CPGs, (see also Kien and Altman,  
488 1984). Moreover, the motor output induced by the SEG *in-vitro*, was monitored in all the  
489 leg CPGs but did not resemble any functional walking gait. This indicates that there is no  
490 complete “coordination program” or “walking motor program” conveyed by the SEG to  
491 the CPG network. Nonetheless, throughout our experiments, a stereotypic bilateral  
492 synchronization pattern of the leg CPGs was induced, suggesting that the SEG can  
493 modulate the overall coordination of the locomotion network.

494 We have tried to limit the likelihood of stimulating severed axons, which originally  
495 traveled from the brain to the SEG or thoracic ganglia, as explained in the methods and

496 results sections. However, as with any extracellular stimulation, we cannot rule out the  
497 possibility that undesired neurites were stimulated. Yet, our finding that the stimulation  
498 of different neuromeres resulted in differentiated activation of the legs MN pools, and  
499 that the coordination pattern established resembled that induced by the unstimulated  
500 SEG, indicates that at least to the degree of affecting the leg motor output, stimulation of  
501 brain DINs did not occur.

## 502 **The SEG bilateral synchronizing influence**

503 We characterized the role of the SEG in modulating the output of the leg CPGs  
504 network using an *in-vitro* preparation that included the thoracic ganglia and the SEG.  
505 Based on our previous study (Knebel et al., 2017), we chose a specific paradigm of  
506 restrictive pilocarpine application to the metathoracic ganglion. This allowed us to  
507 investigate the output of the more rostral pro- and mesothoracic ganglia, their  
508 interconnections, and their connection with the SEG, in the absence of any direct effects  
509 of pilocarpine.

510 We found that the SEG does not alter the firing properties of any individual CPG,  
511 nor their mutual bursting frequencies (Fig. 2B and C, respectively) but, rather, selectively  
512 affects the phase relations of the bilateral CPG couples, most consistently those of the  
513 prothoracic ganglion (Fig. 3). It is possible that the SEG can strengthen the inherent  
514 synchronized bilateral coupling of the prothoracic CPGs (Knebel et al., 2017), and the  
515 prothoracic ganglion, in turn, induces this coupling pattern upon its neighbors through the  
516 synchronizing ipsilateral connections. However, from the neuronal network perspective,  
517 since the ability of all the ganglia to induce activity in the CPGs of other ganglia and  
518 influence their phase is equal (Knebel et al., 2017), it is more plausible that the SEG  
519 modulates all bilateral inter-CPG connections, and that of the prothoracic ganglion is  
520 simply the most responsive. Moreover, the SEG had no noticeable effect on coupling  
521 among the ipsilateral CPGs, whose activities are synchronized independently of it. It  
522 should be noted that these findings were obtained without the animal's brain, and future  
523 studies will investigate its role in the CPGs coordination.

524 Supporting the findings described above, we found various examples of SEG cells  
525 (Fig. 4-6) whose activities increased in phase with the synchronized output of the left and

526 right prothoracic CPGs. In some of these examples, the correlations of the left and right  
527 depressors with the SEG neurons were stronger than their mutual correlation (Fig. 4I-L,  
528 5-6), suggesting that SEG neurons play an active role in bilateral synchronization.  
529 However, due to the unexcitable properties of the soma membrane of those interneurons,  
530 we were unable to elicit action potentials in most of our intracellular experiments, and  
531 thus could not reach any causative conclusions regarding their role in the network.

532 It should be noted that due to our experimental procedure of restrictive  
533 pilocarpine application, all correlated activity of SEG interneurons with the leg CPGs  
534 must be the result of ascending information reaching the SEG and mirroring the CPG  
535 activity. Such information can be referred to as “efference copy” (Jeannerod and Arbib,  
536 2003), and is independent of sensory information (which was unavailable in our  
537 experiments).

### 538 **The octopaminergic system interplay with the coordination of leg CPGs**

539 A potential candidate for the modulation of CPG-CPG interplay in insects is the  
540 octopaminergic system (e.g. Rand et al., 2012; Rillich et al., 2013) and its prominent  
541 members, the DUM neurons (for review: Libersat and Pflueger, 2004). Indeed, we found  
542 that the activity of a descending SEG DUM neurons was correlated with the bilaterally  
543 synchronized activity of the contralateral prothoracic CPGs (Fig. 5-6). This suggests  
544 involvement of the octopaminergic system in the inter-CPG coordination, as all DUM  
545 neurons in the SEG are octopaminergic (Bräunig, 1991; Stevenson and Sporhase-  
546 Eichmann, 1995). Furthermore, we found that EPSPs recorded from a DUM neuron  
547 reliably reflected the co-activation of the front leg depressors. Therefore, an ascending  
548 neuron, or neurons, form synapses on the DUM neuron, eliciting changes in its  
549 membrane potential correlated with the thoracic CPGs activity. This further confirms our  
550 claim that a central efference copy of leg activity is delivered to the SEG.

551 Surprisingly, we found that upon silencing this DUM neuron, the prothoracic  
552 bilateral synchronization increased. Taken together with the rest of our findings, this  
553 result suggests that different neuronal elements in the SEG coordinate leg activity in a  
554 complex, and not necessarily consistent, manner.

555           **The synergy of leg CPGs, higher motor centers, and sensory information in**  
556           **walking**

557           Walking behavior is dependent on the synergies of CPGs activities, sensory inputs,  
558 and higher motor center regulation. Our results indicate the SEG as a potential integration  
559 center: receiving descending inputs from the brain, as the anatomy of its neurons and  
560 those of the brain suggests (Roth et al., 1994), and ascending information from both leg  
561 sensory organs (Kien and Altman, 1984) and the CPGs themselves, as presented here.

562           Since we did not observe in any of our *in-vitro* experiments fictive walking,  
563 namely, a motor output that resembled a functional walking gait, we have to conclude  
564 that, in the locust, functional inter-leg coordination during walking is only accomplished  
565 by way of complementary sensory inputs or descending commands from the brain. This  
566 was also reported for many other walking systems (Büschges et al., 2011) and vast  
567 evidence suggests that sensory inputs plays a major role in walking coordination (e.g.  
568 Borgmann et al., 2007, 2009; Daun-Gruhn, 2011; Fuchs et al., 2012).

569           We did, however, find that the SEG affects the overall leg CPG coordination.  
570 Büschges et al. (1995; based on v. Holst, 1936) suggested that synchronized activity of  
571 locomotive oscillators is the energetically cheapest way to couple them while ensuring  
572 their joint frequency. As we have previously shown, the bilateral coupling among the  
573 CPGs in the thoracic ganglia is flexible and rather weak compared to the ipsilateral  
574 coupling (Knebel et al., 2017). It is therefore plausible that the level of bilateral  
575 synchronization mediated by the SEG is sufficient to drive the two ipsilateral trios of  
576 CPGs to oscillate at similar frequencies, as required for walking straight for example.  
577 Previous studies have already suggested that the SEG is a bilateral mediator (Kien and  
578 Altman, 1984; Kien et al., 1990; Bräunig and Burrows, 2004), but this was posited  
579 mostly due to the anatomy of the majority of the DIN branches, which are contralateral to  
580 their soma (Gal and Libersat, 2006). In light of this known DINs anatomy, and our  
581 physiological findings, it is plausible that a decussation of information and commands  
582 occurs in the SEG: ascending information about the CPGs activity and leg sensory inputs  
583 is received ipsilaterally, while the DINs deliver commands downstream via the  
584 contralateral descending axons, thus regulating the bilateral CPGs connections.

## 585           **A comparison to vertebrate systems**

586           A comparison of the anatomy and function of the SEG and the vertebrate brainstem  
587 suggests some parallels, as previously suggested by Schoofs et al. (2014). In the  
588 hindbrain-lesioned tadpole, for example, only short fictive swimming episodes could be  
589 elicited in response to tactile stimulus (Li et al., 2006), similar to the short sequences of  
590 walking that SEG-less insects perform (Gal and Libersat, 2006). Furthermore,  
591 subpopulations of brainstem neurons mapped functionally and anatomically were shown  
592 to be involved in locomotion initiation and halt (Shik et al., 1969; McClellan and  
593 Grillner, 1984; Sirota et al., 2000; Cabelguen et al., 2003; Hägglund et al., 2010; Esposito  
594 et al., 2014; Bouvier et al., 2015). Specifically, in all the different species examined,  
595 stimulation of the mesencephalic locomotor region (MLR) induced locomotion-related  
596 activity both *in-vivo* and *in-vitro* (Esposito and Arber, 2016). In the tadpole, neuronal  
597 pacemakers in the hindbrain that send descending neurites to the swimming CPGs fire at  
598 the beginning of each swimming cycle, presumably thereby maintaining a swimming  
599 pattern (Soffe et al., 2009). Our experiments showed that the SEG can elicit several burst  
600 cycles in the different leg depressors. It is therefore possible that, in a similar manner to  
601 the tadpole hindbrain, repetitive activity of SEG DINs at the appropriate time during the  
602 step cycle can excite the CPGs to be entrained in a functional manner.

603           Certain findings have also suggested that the brainstem mediates activity of both  
604 sides of the vertebrate body, analogically to the role of the SEG reported here. Each of  
605 the two-sided MLRs is capable of eliciting bilateral activation of the locomotion circuits  
606 along the spinal cord by activating both sides of the reticulospinal tracts simultaneously,  
607 thus delivering symmetrical commands to the spinal cord (Brocard et al., 2010).  
608 Furthermore, it is within the medulla oblongata that the pyramidal tracts (which include  
609 the motor corticospinal fibers), intersect to deliver information to the contralateral lower  
610 motor neurons. Moreover, similar to the brainstem, out of which the cranial nerves  
611 emerge, the SEG control the insect's mouthparts.

## 612           **Conclusion**

613           The SEG plays a regulative role in control of the arthropod legs. It has the ability to  
614 induce movement in all legs in different coordination patterns by activating their CPGs,

615 and it mediates their bilateral activity by adjusting the CPG coupling. Our findings have  
616 revealed ways by which the SEG higher motor center serves as a higher motor center of  
617 legged activity, as has been suggested in previous studies (Kien, 1983; Gal and Libersat,  
618 2006; Bidaye et al., 2014). Overall, we show that the SEG interacts with the leg CPGs to  
619 organize their joint activity; and, being situated in-between the brain and thorax, it  
620 bridges between the brain centers, sensory inputs, and the motor circuits of the legs.  
621 Interestingly, a comparison between the SEG and the vertebrate brain stem suggests some  
622 parallels.

623 As noted above, findings based on *in-vitro* preparations are sometimes difficult to  
624 interpret, especially when they do not completely correspond to the real behavior.  
625 However, our findings did reveal functional connections between the leg CPGs and the  
626 SEG. Hence, the importance of the results, for understanding walking behavior, is clear.  
627 In light of the current findings and those of our previous study (Knebel et al., 2017), it is  
628 now known that the locust CPGs, with and without the SEG inputs, are not naturally  
629 coupled to produce any walking-like coordination. This is a consequence of the highly  
630 modulated system that has to adjust to the heterogeneous environment in which walking  
631 occurs, and therefore must avoid predetermined deterministic movements. Future work  
632 should explore the effects and the roles of other mechanisms modulating the CPG  
633 network, such as further higher motor centers and sensory inputs, and assess their  
634 contribution to walking.

## 635 **References**

- 636 Ayali A, Lange AB. 2010. Rhythmic behaviour and pattern-generating circuits in the  
637 locust: key concepts and recent updates. *J Insect Physiol* [Internet] 56:834–843.  
638 Available from: <http://www.ncbi.nlm.nih.gov/pubmed/20303972>
- 639 Ayali A, Zilberstein Y. 2002. The locust frontal ganglion: a multi-tasked central pattern  
640 generator. *Acta Biol Hung* 55:129–135.
- 641 Bal T, Nagy F, Moulins M. 1988. The pyloric central pattern generator in Crustacea: a set  
642 of conditional neuronal oscillators. *J Comp Physiol A* 163:715–727.
- 643 Bässler U. 1983. *Neural Basis of Elementary Behavior in Stick Insects*. Berlin,  
644 Heidelberg: Springer Berlin Heidelberg. Available from:  
645 <http://link.springer.com/10.1007/978-3-642-68813-3>
- 646 Bässler U, Foth E, Breutel G. 1985. The inherent walking direction differs for the  
647 prothoracic and metathoracic legs of stick insects. *J Exp Biol* [Internet] 116:301–  
648 311. Available from: <http://jeb.biologists.org/content/116/1/301.short>

- 649 Bender JA, Pollack AJ, Ritzmann RE. 2010. Neural Activity in the Central Complex of  
650 the Insect Brain Is Linked to Locomotor Changes. *Curr Biol* [Internet] 20:921–926.  
651 Available from: <http://www.ncbi.nlm.nih.gov/pubmed/20451382>
- 652 Berkowitz A, Laurent G. 1996. Central generation of grooming motor patterns and  
653 interlimb coordination in locusts. *J Neurosci* 16:8079–8091.
- 654 Bidaye SS, Machacek C, Wu Y, Dickson BJ. 2014. Neuronal Control of *Drosophila*  
655 Walking Direction. *Science* [Internet] 344:97–101. Available from:  
656 <http://www.sciencemag.org/cgi/doi/10.1126/science.1249964>
- 657 Borgmann A, Hooper SL, Büschges A. 2009. Sensory feedback induced by front-leg  
658 stepping entrains the activity of central pattern generators in caudal segments of the  
659 stick insect walking system. *J Neurosci* [Internet] 29:2972–2983. Available from:  
660 <http://www.ncbi.nlm.nih.gov/pubmed/19261892>
- 661 Borgmann A, Scharstein H, Büschges A. 2007. Intersegmental coordination: influence of  
662 a single walking leg on the neighboring segments in the stick insect walking system.  
663 *J Neurophysiol* [Internet] 98:1685–1696. Available from:  
664 <http://www.ncbi.nlm.nih.gov/pubmed/17596420>
- 665 Bouvier J, Caggiano V, Leiras R, Caldeira V, Bellardita C, Balueva K, Fuchs A, Kiehn  
666 O. 2015. Descending Command Neurons in the Brainstem that Halt Locomotion.  
667 *Cell* [Internet] 163:1191–1203. Available from:  
668 <http://dx.doi.org/10.1016/j.cell.2015.10.074>
- 669 Bräunig P. 1991. Suboesophageal DUM Neurons Innervate the Principal Neuropiles of  
670 the Locust Brain. *Philos Trans R Soc B Biol Sci* [Internet] 332:221–240. Available  
671 from: <http://rstb.royalsocietypublishing.org/cgi/doi/10.1098/rstb.1991.0051>
- 672 Bräunig P, Burrows M. 2004. Projection patterns of posterior dorsal unpaired median  
673 neurons of the locust subesophageal ganglion. *J Comp Neurol* 478:164–175.
- 674 Brocard F, Ryczko D, Fenelon K, Hatem R, Gonzales D, Auclair F, Dubuc R. 2010. The  
675 transformation of a unilateral locomotor command into a symmetrical bilateral  
676 activation in the brainstem. *J Neurosci* [Internet] 30:523–533. Available from:  
677 <http://www.ncbi.nlm.nih.gov/pubmed/20071515>
- 678 Büschges A, Schmitz J, Bässler U. 1995. Rhythmic patterns in the thoracic nerve cord of  
679 the stick insect induced by pilocarpine. *J Exp Biol* [Internet] 198:435–456.  
680 Available from: <http://www.ncbi.nlm.nih.gov/pubmed/9318078>
- 681 Büschges A, Scholz H, El Manira A. 2011. New moves in motor control. *Curr Biol*  
682 [Internet] 21:R513–R524. Available from:  
683 <http://www.ncbi.nlm.nih.gov/pubmed/21741590>
- 684 Cabelguen J-M, Bourcier-Lucas C, Dubuc R. 2003. Bimodal locomotion elicited by  
685 electrical stimulation of the midbrain in the salamander *Notophthalmus viridescens*.  
686 *J Neurosci* 23:2434–2439.
- 687 Campbell JI. 1961. The anatomy of the nervous system of the mesothorax of *Locusta*  
688 *migratoria migratorioides* R. & F. In: *Proceedings of the Zoological Society of*  
689 *London*. Vol. 137. Wiley Online Library. p 403–432.
- 690 Cholewa J, Pflüger H-J. 2009. Descending unpaired median neurons with bilaterally  
691 symmetrical axons in the suboesophageal ganglion of *Manduca sexta* larvae.  
692 *Zoology (Jena)* [Internet] 112:251–262. Available from:  
693 <http://www.ncbi.nlm.nih.gov/pubmed/19423308>
- 694 Chrachri A, Clarac F. 1987. Induction of rhythmic activity in motoneurons of crayfish

- 695 thoracic ganglia by cholinergic agonists. *Neurosci Lett* 77:49–54.
- 696 Daun-Gruhn S. 2011. A mathematical modeling study of inter-segmental coordination  
697 during stick insect walking. *J Comput Neurosci* [Internet] 30:255–278. Available  
698 from: <http://www.ncbi.nlm.nih.gov/pubmed/20567889>
- 699 David I, Holmes P, Ayali A. 2016. Endogenous rhythm and pattern-generating circuit  
700 interactions in cockroach motor centres. *Biol Open* [Internet] 5:1229–1240.  
701 Available from: <http://www.ncbi.nlm.nih.gov/pubmed/27422902>
- 702 Dubuc R, Brocard F, Antri M, Fénelon K, Gariépy J-F, Smetana R, Ménard A, Le Ray D,  
703 Viana Di Prisco G, Pearlstein E, Sirota MG, Derjean D, St-Pierre M, Zielinski B,  
704 Auclair F, Veilleux D. 2008. Initiation of locomotion in lampreys. *Brain Res Rev*  
705 [Internet] 57:172–182. Available from:  
706 <http://www.ncbi.nlm.nih.gov/pubmed/17916380>
- 707 Esposito MS, Arber S. 2016. Motor Control: Illuminating an Enigmatic Midbrain  
708 Locomotor Center. *Curr Biol* [Internet] 26:R291–R293. Available from:  
709 <http://dx.doi.org/10.1016/j.cub.2016.02.043>
- 710 Esposito MS, Capelli P, Arber S. 2014. Brainstem nucleus MdV mediates skilled  
711 forelimb motor tasks. *Nature* [Internet] 508:351–356. Available from:  
712 <http://www.ncbi.nlm.nih.gov/pubmed/24487621>
- 713 Fritsch G, Hitzig E. 2009. Electric excitability of the cerebrum (Über die elektrische  
714 Erregbarkeit des Grosshirns). *Epilepsy Behav* [Internet] 15:123–130. Available  
715 from: <http://linkinghub.elsevier.com/retrieve/pii/S1525505009001334>
- 716 Fuchs E, Holmes P, David I, Ayali A. 2012. Proprioceptive feedback reinforces centrally  
717 generated stepping patterns in the cockroach. *J Exp Biol* [Internet] 215:1884–1891.  
718 Available from: <http://www.ncbi.nlm.nih.gov/pubmed/22573767>
- 719 Fuchs E, Holmes P, Kiemel T, Ayali A. 2011. Intersegmental coordination of cockroach  
720 locomotion: adaptive control of centrally coupled pattern generator circuits. *Front*  
721 *Neural Circuits* [Internet] 4:125. Available from:  
722 <http://www.pubmedcentral.nih.gov/articlerender.fcgi?artid=3043608&tool=pmcentr>  
723 [ez&rendertype=abstract](http://www.pubmedcentral.nih.gov/articlerender.fcgi?artid=3043608&tool=pmcentr&rendertype=abstract)
- 724 Gal R, Libersat F. 2006. New vistas on the initiation and maintenance of insect motor  
725 behaviors revealed by specific lesions of the head ganglia. *J Comp Physiol A*  
726 *Neuroethol Sensory, Neural, Behav Physiol* [Internet] 192:1003–1020. Available  
727 from: <http://www.ncbi.nlm.nih.gov/pubmed/16733727>
- 728 Gal R, Libersat F. 2008. A Parasitoid Wasp Manipulates the Drive for Walking of Its  
729 Cockroach Prey. *Curr Biol* [Internet] 18:877–882. Available from:  
730 <http://www.pubmedcentral.nih.gov/articlerender.fcgi?artid=2850919&tool=pmcentr>  
731 [ez&rendertype=abstract](http://www.pubmedcentral.nih.gov/articlerender.fcgi?artid=2850919&tool=pmcentr&rendertype=abstract)
- 732 Gordon IT, Whelan PJ. 2008. Brainstem modulation of locomotion in the neonatal mouse  
733 spinal cord. *J Physiol* [Internet] 586:2487–2497. Available from:  
734 <http://doi.wiley.com/10.1113/jphysiol.2007.148320>
- 735 Grabowska M, Godlewska E, Schmidt J, Daun-Gruhn S. 2012. Quadrupedal gaits in  
736 hexapod animals - inter-leg coordination in free-walking adult stick insects. *J Exp*  
737 *Biol* [Internet] 215:4255–4266. Available from:  
738 <http://www.ncbi.nlm.nih.gov/pubmed/22972892>
- 739 Gray JR, Robertson RM. 1998. Effects of heat stress on axonal conduction in the locust  
740 flight system. *Comp Biochem Physiol Part A Mol Integr Physiol* [Internet] 120:181–



- 741 186. Available from:  
742 <http://linkinghub.elsevier.com/retrieve/pii/S1095643398100284>  
743 Hägglund M, Borgius L, Dougherty KJ, Kiehn O. 2010. Activation of groups of  
744 excitatory neurons in the mammalian spinal cord or hindbrain evokes locomotion.  
745 *Nat Neurosci* [Internet] 13:246–52. Available from:  
746 <http://www.ncbi.nlm.nih.gov/pubmed/20081850>  
747 Heidel E, Pflüger HJ. 2006. Ion currents and spiking properties of identified subtypes of  
748 locust octopaminergic dorsal unpaired median neurons. *Eur J Neurosci* 23:1189–  
749 1206.  
750 v. Holst E. 1936. Über den „Magnet-Effekt“ als koordinierendes Prinzip im Rückenmark.  
751 Pflüger’s Arch für die gesamte Physiol des Menschen und der Tiere [Internet]  
752 237:655–682. Available from: <http://link.springer.com/10.1007/BF01753051>  
753 Huber F. 1960. Untersuchungen über die Funktion des Zentralnervensystems und  
754 insbesondere des Gehirnes bei der Fortbewegung und der Lauterzeugung der  
755 Grillen. *Z Vgl Physiol* 44:60–132.  
756 Hussaini SA, Menzel R. 2013. Mushroom Body Extrinsic Neurons in the Honeybee  
757 Brain Encode Cues and Contexts Differently. *J Neurosci* [Internet] 33:7154–7164.  
758 Available from: [http://www.jneurosci.org/cgi/doi/10.1523/JNEUROSCI.1331-](http://www.jneurosci.org/cgi/doi/10.1523/JNEUROSCI.1331-12.2013)  
759 [12.2013](http://www.jneurosci.org/cgi/doi/10.1523/JNEUROSCI.1331-12.2013)  
760 Ito K, Shinomiya K, Ito M, Armstrong JD, Boyan G, Hartenstein V, Harzsch S,  
761 Heisenberg M, Homberg U, Jenett A, Keshishian H, Restifo LL, Roessler W,  
762 Simpson JH, Strausfeld NJ, Strauss R, Vossell LB. 2014. A systematic  
763 nomenclature for the insect brain. *Neuron* 81:755–765.  
764 Jeannerod M, Arbib M. 2003. Action monitoring and forward control of movements. In:  
765 Arbib M, editor. *The Handbook of Brain Theory and Neural Networks*. 2nd ed.  
766 Cambridge, MA: MIT Press. p 83–85.  
767 Johnston RM, Levine RB. 2002. Thoracic leg motoneurons in the isolated CNS of adult  
768 *Manduca* produce patterned activity in response to pilocarpine, which is distinct  
769 from that produced in larvae. *Invertebr Neurosci* 4:175–192.  
770 Kahn J, Roberts A. 1982a. The central nervous origin of the swimming motor pattern in  
771 embryos of *Xenopus Laevis*. *J Exp Biol* [Internet] 99:185–196. Available from:  
772 <http://www.ncbi.nlm.nih.gov/pubmed/7130897>  
773 Kahn J, Roberts A. 1982b. Experiments on the Central Pattern Generator for Swimming  
774 in Amphibian Embryos. *Philos Trans R Soc B Biol Sci* [Internet] 296:229–243.  
775 Available from:  
776 <http://rstb.royalsocietypublishing.org/cgi/doi/10.1098/rstb.1982.0004>  
777 Kaiser M, Libersat F. 2015. The role of the cerebral ganglia in the venom-induced  
778 behavioral manipulation of cockroaches stung by the parasitoid jewel wasp. *J Exp*  
779 *Biol* 218:1022–1027.  
780 Kien J. 1983. The Initiation and Maintenance of Walking in the Locust: An Alternative to  
781 the Command Concept. *Proc R Soc B Biol Sci* [Internet] 219:137–174. Available  
782 from: <http://rspb.royalsocietypublishing.org/cgi/doi/10.1098/rspb.1983.0065>  
783 Kien J. 1990a. Neuronal activity during spontaneous walking-I. Starting and stopping.  
784 *Comp Biochem Physiol -- Part A Physiol* [Internet] 95:607–621. Available from:  
785 <http://www.sciencedirect.com/science/article/pii/030096299090747G>  
786 Kien J. 1990b. Neuronal activity during spontaneous walking--II. Correlation with

- 787 stepping. *Comp Biochem Physiol Part A* [Internet] 95:623–638. Available from:  
788 <http://www.ncbi.nlm.nih.gov/pubmed/1971548>
- 789 Kien J, Altman JS. 1984. Descending interneurons from the brain and suboesophageal  
790 ganglia and their role in the control of locust behaviour. *J Insect Physiol* [Internet]  
791 30:59–72. Available from:  
792 <http://www.sciencedirect.com/science/article/pii/0022191084901082>
- 793 Kien J, Altman JS. 1992. Preparation and execution of movement: parallels between  
794 insect and mammalian motor systems. *Comp Biochem Physiol Comp Physiol*  
795 [Internet] 103:15–24. Available from:  
796 <http://www.ncbi.nlm.nih.gov/pubmed/1356693>
- 797 Kien J, Fletcher WA, Altman JS, Ramirez JM, Roth U. 1990. Organisation of  
798 intersegmental interneurons in the suboesophageal ganglion of *Schistocerca gregaria*  
799 (*Forksal*) and *Locusta migratoria migratorioides* (*Reiche & Fairmaire*) (*Acrididae*,  
800 *Orthoptera*. *Int J Insect Morphol Embryol* [Internet] 19:35–60. Available from:  
801 <http://linkinghub.elsevier.com/retrieve/pii/0020732290900290>
- 802 Kien J, Williams M. 1983. Morphology of Neurons in Locust Brain and Suboesophageal  
803 Ganglion Involved in Initiation and Maintenance of Walking. *Proc R Soc B Biol Sci*  
804 [Internet] 219:175–192. Available from:  
805 <http://rspb.royalsocietypublishing.org/cgi/doi/10.1098/rspb.1983.0066>
- 806 Knebel D, Ayali A, Pflueger H-J, Rillich J. 2017. Rigidity and Flexibility: The Central  
807 Basis of Inter-Leg Coordination in the Locust. *Front Neural Circuits* 10:112.
- 808 Li WC, Roberts A, Soffe SR. 2009. Locomotor rhythm maintenance: electrical coupling  
809 among premotor excitatory interneurons in the brainstem and spinal cord of young  
810 *Xenopus* tadpoles. *J Physiol* [Internet] 587:1677–1693. Available from:  
811 <http://www.pubmedcentral.nih.gov/articlerender.fcgi?artid=2683956&tool=pmcentr>  
812 [ez&rendertype=abstract](http://www.pubmedcentral.nih.gov/articlerender.fcgi?artid=2683956&tool=pmcentr&rendertype=abstract)
- 813 Li WC, Roberts A, Soffe SR. 2010. Specific brainstem neurons switch each other into  
814 pacemaker mode to drive movement by activating NMDA receptors. *J Neurosci*  
815 [Internet] 30:16609–16620. Available from:  
816 <http://www.pubmedcentral.nih.gov/articlerender.fcgi?artid=3044868&tool=pmcentr>  
817 [ez&rendertype=abstract](http://www.pubmedcentral.nih.gov/articlerender.fcgi?artid=3044868&tool=pmcentr&rendertype=abstract)
- 818 Li WC, Soffe SR, Wolf E, Roberts A. 2006. Persistent responses to brief stimuli:  
819 feedback excitation among brainstem neurons. *J Neurosci* [Internet] 26:4026–4035.  
820 Available from: <http://www.ncbi.nlm.nih.gov/pubmed/16611819>
- 821 Libersat F, Pflueger H-J. 2004. Monoamines and the Orchestration of Behavior.  
822 *Bioscience* 54:17–25.
- 823 Marder E. 2012. Neuromodulation of Neuronal Circuits: Back to the Future. *Neuron*  
824 [Internet] 76:1–11. Available from: <http://dx.doi.org/10.1016/j.neuron.2012.09.010>
- 825 Marder E, Bucher D. 2001. Central pattern generators and the control of rhythmic  
826 movements. *Curr Biol* [Internet] 11:R986–R996. Available from:  
827 <http://www.ncbi.nlm.nih.gov/pubmed/11728329>
- 828 Marder E, Bucher D. 2007. Understanding circuit dynamics using the stomatogastric  
829 nervous system of lobsters and crabs. *Annu Rev Physiol* 69:291–316.
- 830 McClellan AD, Grillner S. 1984. Activation of “fictive swimming” by electrical  
831 microstimulation of brainstem locomotor regions in an in vitro preparation of the  
832 lamprey central nervous system. *Brain Res* [Internet] 300:357–361. Available from:

- 833 <http://www.ncbi.nlm.nih.gov/pubmed/6733478>
- 834 Miller WL, Sigvardt KA. 1998. Spectral analysis of oscillatory neural circuits. *J Neurosci*
- 835 *Methods* 80:113–128.
- 836 Mu L, Ritzmann RE. 2008. Interaction between descending input and thoracic reflexes
- 837 for joint coordination in cockroach: I. Descending influence on thoracic sensory
- 838 reflexes. *J Comp Physiol A Neuroethol Sensory, Neural, Behav Physiol* [Internet]
- 839 194:283–298. Available from: <http://www.ncbi.nlm.nih.gov/pubmed/18094976>
- 840 Mulloney B, Smarandache C. 2010. Fifty Years of CPGs: Two Neuroethological Papers
- 841 that Shaped the Course of Neuroscience. *Front Behav Neurosci* [Internet] 4:1–8.
- 842 Available from:
- 843 <http://www.pubmedcentral.nih.gov/articlerender.fcgi?artid=2917247&tool=pmcentr>
- 844 [ez&rendertype=abstract](http://www.pubmedcentral.nih.gov/articlerender.fcgi?artid=2917247&tool=pmcentr&rendertype=abstract)
- 845 Penfield W, Boldrey E. 1937. Somatic motor and sensory representation in the cerebral
- 846 cortex of man as studied by electrical stimulation. *Brain A J Neurol* 60:389–443.
- 847 Pfeiffer K, Homberg U. 2014. Organization and functional roles of the central complex in
- 848 the insect brain. *Annu Rev Entomol* [Internet] 59:165–84. Available from:
- 849 <http://www.ncbi.nlm.nih.gov/pubmed/24160424>
- 850 Poeck B, Triphan T, Neuser K, Strauss R. 2008. Locomotor control by the central
- 851 complex in *Drosophila* - An analysis of the tay bridge mutant. *Dev Neurobiol*
- 852 [Internet] 68:1046–1058. Available from:
- 853 <http://www.ncbi.nlm.nih.gov/pubmed/18446784>
- 854 Rand D, Knebel D, Ayali A. 2012. The effect of octopamine on the locust stomatogastric
- 855 nervous system. *Front Physiol* [Internet] 3:288. Available from:
- 856 <http://www.pubmedcentral.nih.gov/articlerender.fcgi?artid=3429060&tool=pmcentr>
- 857 [ez&rendertype=abstract](http://www.pubmedcentral.nih.gov/articlerender.fcgi?artid=3429060&tool=pmcentr&rendertype=abstract)
- 858 Ridgel AL, Ritzmann RE. 2005. Effects of neck and circumoesophageal connective
- 859 lesions on posture and locomotion in the cockroach. *J Comp Physiol A* 191:559–
- 860 573.
- 861 Rillich J, Stevenson PA, Pflüger H-J. 2013. Flight and Walking in Locusts-Cholinergic
- 862 Co-Activation, Temporal Coupling and Its Modulation by Biogenic Amines. *PLoS*
- 863 *One* [Internet] 8:e62899. Available from:
- 864 <http://www.pubmedcentral.nih.gov/articlerender.fcgi?artid=3650027&tool=pmcentr>
- 865 [ez&rendertype=abstract](http://www.pubmedcentral.nih.gov/articlerender.fcgi?artid=3650027&tool=pmcentr&rendertype=abstract)
- 866 Roth U, Kien J, Altman JS. 1994. Projections of suboesophageal descending interneurons
- 867 in thoracic ganglia of the grasshopper *Omocestus viridulus* L. (Orthoptera:
- 868 Acrididae). *Int J Insect Morphol Embryol* [Internet] 23:275–291. Available from:
- 869 <http://www.sciencedirect.com/science/article/pii/0020732294900248>
- 870 Rybak IA, Dougherty KJ, Shevtsova NA. 2015. Organization of the Mammalian
- 871 Locomotor CPG: Review of Computational Model and Circuit Architectures Based
- 872 on Genetically Identified Spinal Interneurons. *eNeuro* [Internet] 2. Available from:
- 873 <http://eneuro.sfn.org/cgi/doi/10.1523/ENEURO.0069-15.2015>
- 874 Ryckebusch S, Laurent G. 1993. Rhythmic patterns evoked in locust leg motor neurons
- 875 by the muscarinic agonist pilocarpine. *J Neurophysiol* [Internet] 69:1583–1595.
- 876 Available from: <http://www.ncbi.nlm.nih.gov/pubmed/8389831>
- 877 Ryckebusch S, Laurent G. 1994. Interactions between segmental leg central pattern
- 878 generators during fictive rhythms in the locust. *J Neurophysiol* [Internet] 72:2771–

- 879 2785. Available from: <http://www.ncbi.nlm.nih.gov/pubmed/7897488>
- 880 Ryckebusch S, Wehr M, Laurent G. 1994. Distinct rhythmic locomotor patterns can be  
881 generated by a simple adaptive neural circuit: Biology, simulation, and VLSI  
882 implementation. *J Comput Neurosci* [Internet] 1:339–358. Available from:  
883 <http://www.ncbi.nlm.nih.gov/pubmed/8792239>
- 884 Schmidt RA, Lee TD. 2005. *Motor Control and Learning: A Behaviour Emphasis*. 5th ed.  
885 Champaign, IL: Human kinetics.
- 886 Schoofs A, Hückesfeld S, Schlegel P, Miroschnikow A, Peters M, Zeymer M, Spieß R,  
887 Chiang AS, Pankratz MJ. 2014. Selection of Motor Programs for Suppressing Food  
888 Intake and Inducing Locomotion in the *Drosophila* Brain. *PLoS Biol* 12.
- 889 Shik ML, Severin F V, Orlovsky GN. 1969. Control of walking and running by means of  
890 electrical stimulation of the mesencephalon. *Electroencephalogr Clin Neurophysiol*  
891 [Internet] 26:549. Available from: <http://www.ncbi.nlm.nih.gov/pubmed/4181500>
- 892 Sigvardt KA, Miller WL. 1998. Analysis and modeling of the locomotor central pattern  
893 generator as a network of coupled oscillators. In: *Annals of the New York Academy*  
894 *of Sciences*. Vol. 860. . p 250–265.
- 895 Sirota MG, Di Prisco GV, Dubuc R. 2000. Stimulation of the mesencephalic locomotor  
896 region elicits controlled swimming in semi-intact lampreys. *Eur J Neurosci*  
897 12:4081–4092.
- 898 Soffe SR, Roberts A, Li WC. 2009. Defining the excitatory neurons that drive the  
899 locomotor rhythm in a simple vertebrate: insights into the origin of reticulospinal  
900 control. *J Physiol* [Internet] 587:4829–4844. Available from:  
901 <http://www.pubmedcentral.nih.gov/articlerender.fcgi?artid=2770150&tool=pmcentr>  
902 [ez&rendertype=abstract](http://www.pubmedcentral.nih.gov/articlerender.fcgi?artid=2770150&tool=pmcentrez&rendertype=abstract)
- 903 Stevenson PA, Kutsch W. 1987. A reconsideration of the central pattern generator  
904 concept for locust flight. *J Comp Physiol A* [Internet] 161:115–129. Available from:  
905 <http://link.springer.com/10.1007/BF00609460>
- 906 Stevenson PA, Sporhase-Eichmann U. 1995. Localization of octopaminergic neurons in  
907 insects. *Comp Biochem Physiol B* 11:203–215.
- 908 Strausfeld NJ, Hansen L, Li Y, Gomez RS, Ito K. 1998. Evolution, discovery, and  
909 interpretations of arthropod mushroom bodies. *Learn Mem* [Internet] 5:11–37.  
910 Available from: <http://www.ncbi.nlm.nih.gov/pubmed/10454370>
- 911 Strauss R. 2002. The central complex and the genetic dissection of locomotor behaviour.  
912 *Curr Opin Neurobiol* [Internet] 12:633–638. Available from:  
913 <http://linkinghub.elsevier.com/retrieve/pii/S0959438802003859>
- 914 Tastekin I, Riedl J, Schilling-Kurz V, Gomez-Marin A, Truman JW, Louis M. 2015. Role  
915 of the subesophageal zone in sensorimotor control of orientation in *drosophila* larva.  
916 *Curr Biol* [Internet] 25:1448–1460. Available from:  
917 <http://dx.doi.org/10.1016/j.cub.2015.04.016>
- 918 Wilson M. 1966. Insect Walking. *Annu Rev Entomol* [Internet]:103–122. Available  
919 from: <http://www.annualreviews.org/doi/pdf/10.1146/annurev.en.11.010166.000535>
- 920 Legends

921 **Figure 1**

922 **SEG electrical stimulation elicits leg motor outputs.** (A) Scan of the SEG after staining  
923 one neck connective. The dyed somas represent about half of the SEG DIN population.  
924 Scale bar: 100  $\mu\text{m}$  (B) Maximum intensity projection showing the double labeling of  
925 neck connective (red) and nerve 5A staining (green) in the metathoracic ganglion.  
926 Arrows in the pictograms and the scan indicate the stained nerves. Scale bar: 100  $\mu\text{m}$ . (C)  
927 A single horizontal optical section from the framed zone in (B), showing the overlapping  
928 area of the depressor motor neurons and DINs projections. Scale bar: 100  $\mu\text{m}$  (D) An  
929 example of a typical SEG stimulation of the neurons of the mandibular neuromere  
930 resulting in a brief elicited activity of the depressor MN of the pro- and mesothoracic  
931 ganglia. Scale bar: 5 s (E) An example of a typical SEG stimulation of the labial  
932 neuromere resulting in a prolonged rhythmic bursting activity of all recorded thoracic  
933 ganglia (Df, fast depressor; Ds, slow depressor; CI, common inhibitor). Scale bar: 5 s.

934 **Figure 2**

935 **Pharmacological stimulation of the metathoracic ganglion induces rhythmic**  
936 **bursting activity in all three thoracic ganglia.** (A) The pictogram schematically  
937 presents the three thoracic ganglia and SEG. Pilocarpine was applied to the metathoracic  
938 ganglion only, as indicated by the gray filling. The arrows indicate the recording sites (4  
939 depressor nerves and 3 connectives), as demonstrated by the recording trace. Scale bar: 10  
940 s. (B) The spike frequency throughout the 8 min of recording, for each hemiganglion  
941 (pro-, meso-, metathoracic hemiganglia – T1, T2 and T3, respectively), with and without  
942 the SEG. No significant difference was found. (C) The most common frequency of the  
943 pro- and mesothoracic hemiganglia and the ipsilateral source of activation – the  
944 ipsilateral hemiganglia (T1 and T2, respectively), before and after SEG removal. Again,  
945 no significant difference was found.

946 **Figure 3**

947 **The overall CPG-CPG phase relations are affected by the SEG.** (A) The bilateral  
948 synchrony of the prothoracic CPGs before the SEG removal. The recording exemplifies  
949 the typical bursting activity of both hemiganglia. The circular histogram presents the  
950 phase of the prothoracic contralateral CPGs of all experiments. The bar filling colors  
951 represents the value of the synchronization index, as indicated by the color scale below.  
952 The sample size represents only the experiments in which we recorded the bilateral  
953 prothoracic activity. (B) As in (A) but for the activity of prothoracic CPGs after the SEG  
954 removal. The phase calculated for the two conditions was significantly different. Scale  
955 bar: 2 s. (C) A scheme of the CPGs phases before the SEG removal. The colors of the  
956 interconnecting lines between the pro-, meso- and metathoracic hemiganglia (upper,  
957 middle, and bottom circle pairs, respectively), represent the synchronization index values  
958 of each pair of CPGs, as shown on the color scale on the right. (D) As in (C) but after the  
959 SEG removal. (E) As in (C) but for experiments in which the SEG was removed from the  
960 thoracic ganglia chain at the dissection stage. Note that after the SEG removal, the  
961 bilateral CPG connections are drawn to anti-phase activity, while the ipsilateral  
962 connections remain in-phase, similarly to the experiments in which the SEG was not  
963 present from the beginning. \*\*\*  $p < 0.001$ .

964

## Figure 4

965 **SEG interneurons activity correlates with the prothoracic depressors joint activity.**  
966 (A) Overlays of three simultaneous recordings from the connectives (one for each),  
967 indicated by the arrows in the pictogram. The black line represents the average vector of  
968 these overlays. The constant delay of 1.8 ms from the SEG downwards to the ipsilateral  
969 pro-meso connective indicates that the spike is generated by a neuron in the SEG,  
970 sending a descending neurite to all thoracic ganglia. Scale bar: 5 ms (B) Cross-covariance  
971 between the SEG DIN firing and the left and right prothoracic depressors (blue and red  
972 lines, respectively) and the right metathoracic depressor (green line). (C) Cross-  
973 covariance between the left and right prothoracic CPGs. (D) Merged cross-covariance of  
974 the left and right prothoracic depressors with the SEG DIN, from the narrow grayed  
975 window in (B). The intersection of the 0 values presents the time of the SEG DIN firing,  
976 and the colors indicate degree of correlation between the left and right depressors, as  
977 indicated by the color scale above. Note that the blue spot in (D) is smeared upwards,  
978 indicating that the peak of correlation is not at the spike onset, and a delayed prolonged  
979 elicited activity is recorded from the CPG contralateral to the DIN. Since no clear  
980 correlation is found between the DIN and the metathoracic depressor, as shown in (B), it  
981 is a candidate DIN for specifically synchronizing the prothoracic contralateral CPGs. (E)  
982 Simultaneous intracellular recording of a SEG neuron and the thoracic motor activity.  
983 Horizontal and vertical scale bars: 1 s and 10 mV, respectively. The confocal scan shows  
984 the recorded SEG neuron. Note that the neuron sends a neurite to the neck connective  
985 (indicated by the white arrow). Scale bar: 80  $\mu\text{m}$ . (F) Cross-covariance between the SEG  
986 DIN membrane potential and the left and right prothoracic depressors (blue and red lines,  
987 respectively) and the right metathoracic depressor (green line). (G) As in (C), but for the  
988 prothoracic activity in the preparation shown in (E). (H) As in (D), but for the  
989 prothoracic and DIN activity in this preparation shown in (E) Note the resemblance to the  
990 SEG DIN shown in (D). (I) Simultaneous intracellular recording of SEG neuron and the  
991 thoracic motor activity. Horizontal and vertical scale bars: 1 s and 10 mV, respectively.  
992 The confocal scan shows the recorded SEG neuron. Scale bar: 80  $\mu\text{m}$ . (J) Cross-  
993 covariance between the SEG interneuron spikes and the left and right prothoracic  
994 depressors (blue and red lines, respectively), and the right metathoracic depressor (green  
995 line). (K) As in (C), but for the prothoracic activity in the preparation shown in (I) (L) As  
996 in (D), but for the prothoracic and DIN activity in this preparation shown in (I). Note that  
997 despite the weak correlation between the left and right depressors, as seen in (K), the  
998 correlation at the time of the SEG neuron spike is clear, as seen in (J).

999

## Figure 5

1000 **A SEG DUM neuron activity is correlated with the prothoracic depressors joint**  
1001 **activity.** (A) An overlay of 3 recordings from the connectives, shown by the arrows in  
1002 the pictogram. The almost simultaneous spike (constant delay of 0.4 ms) in both the left  
1003 and right connectives indicates that the spike is generated by a neuron in the SEG,  
1004 sending two descending neurites to the thoracic ganglia, typical for SEG DUM neurons.  
1005 Scale bar: 5 ms. (B) Cross-covariance between the SEG DIN firing and the left and right  
1006 prothoracic depressors (blue and red lines, respectively) and the right metathoracic

1007 depressor (green line). **(C)** Cross-covariance between the left and right prothoracic CPGs.  
1008 **(D)** Merged cross-covariance of the left and right prothoracic depressors with the SEG  
1009 DIN, from the narrow grayed window in **(B)**. The intersection of the 0 values presents the  
1010 time of the SEG DIN firing, and the colors indicate degree of correlation between the left  
1011 and right depressors, as indicated by the color scale above.

1012 **Figure 6**

1013 **A SEG DUM neuron activity is correlated with the prothoracic depressors joint**  
1014 **activity.** **(A)** Confocal scan shows the recorded SEG neuron. Scale bar: 80  $\mu\text{m}$ . **(B)**  
1015 Simultaneous intracellular recording of SEG neuron and the thoracic motor activity.  
1016 Horizontal and vertical scale bars: 50 ms and 10 mV, respectively. Note the medial  
1017 position of the neuron, its symmetrical arborization, and its long duration soma spikes.  
1018 Together, these neuronal characteristics indicate that it is a SEG DUM neuron. **(C)** Cross-  
1019 covariance between the SEG DIN firing and different sets of depressors (right  
1020 prothoracic: blue; left prothoracic: red; right metathoracic: green). **(D)** Cross-covariance  
1021 between the left and right prothoracic depressors **(E)** Merged cross-covariance of the left  
1022 and right prothoracic depressors with the SEG DIN, from the narrow grayed window in  
1023 **(C)**. The intersection of the 0 values presents the time of the SEG DIN firing, and the  
1024 colors indicate degree of correlation between the left and right depressors, as indicated by  
1025 the color scale above. **(F)** Simultaneous intracellular recording of SEG neuron and the  
1026 thoracic motor activity before, during, and after a short depolarization. Horizontal and  
1027 vertical scale bars: 2 s and 10 mV, respectively. **(G)** Simultaneous intracellular recording  
1028 of the SEG DIN and the thoracic motor activity during a permanent hyperpolarization.  
1029 Horizontal and vertical scale bars: 2 s and 10 mV, respectively. **(H)**, **(I)** and **(J)**  
1030 are the same as **(C)**, **(D)**, & **(E)** respectively, but for the SEG DIN during the permanent  
1031 hyperpolarization, and conducted by analyzing the changes in its membrane potential.

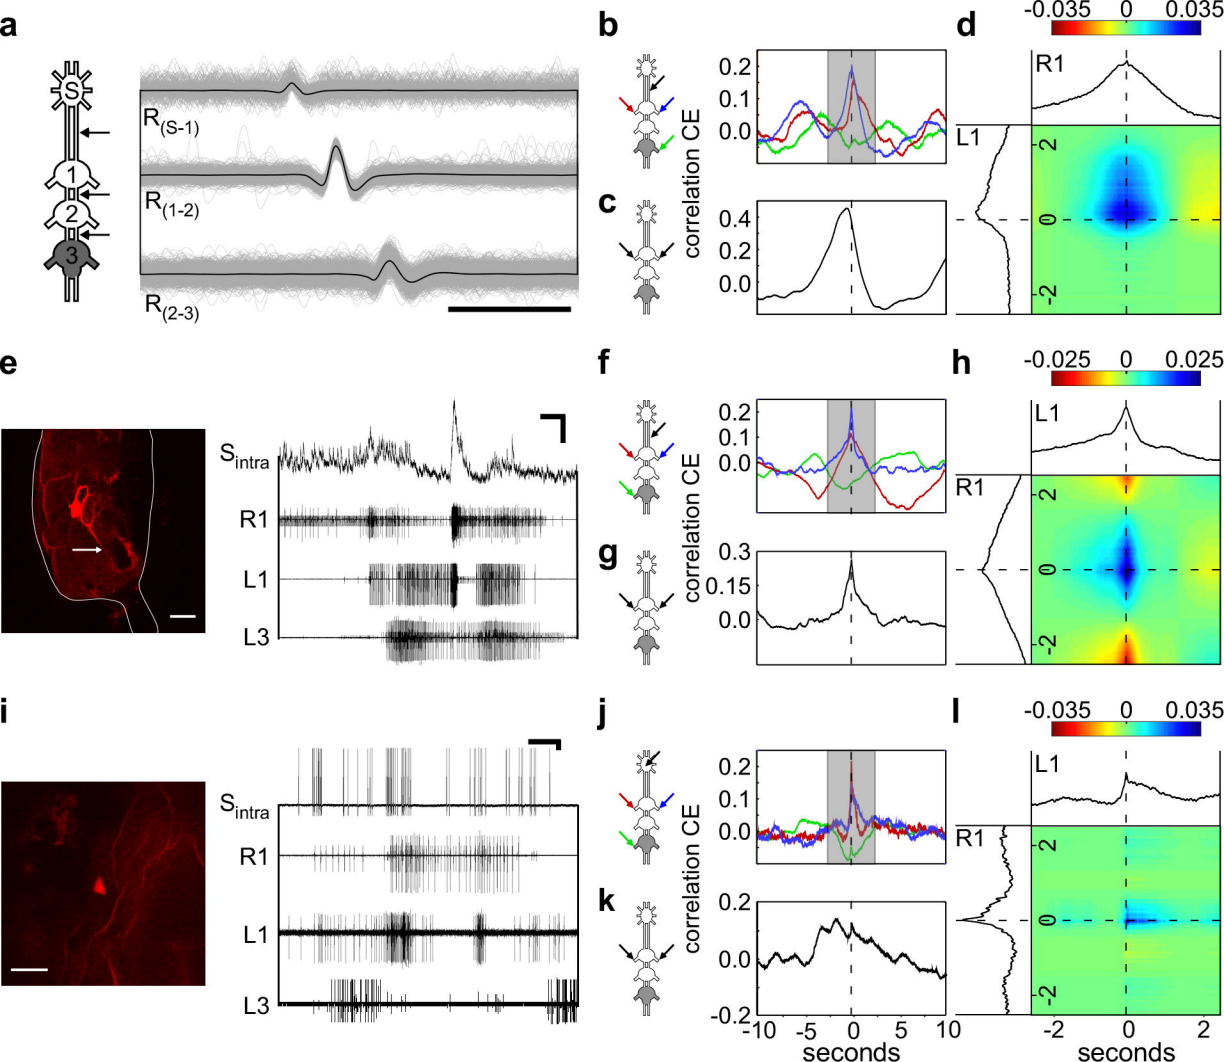



**a**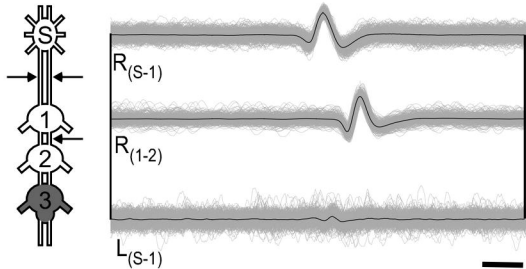**b**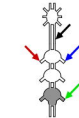**c**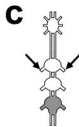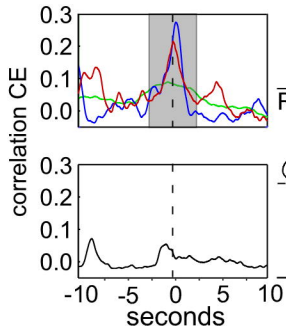**d**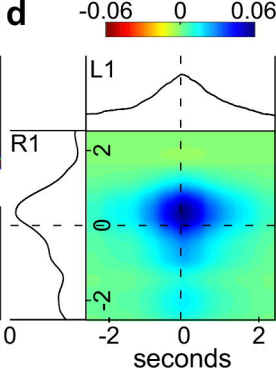

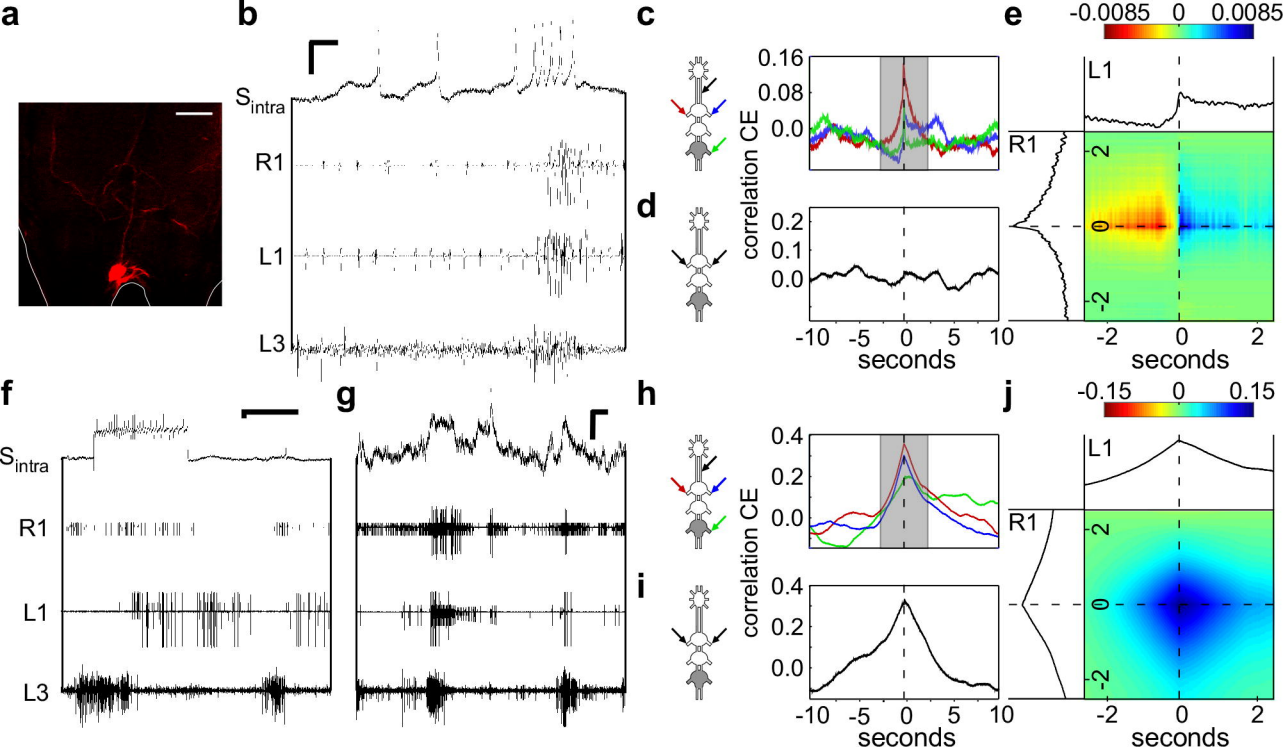

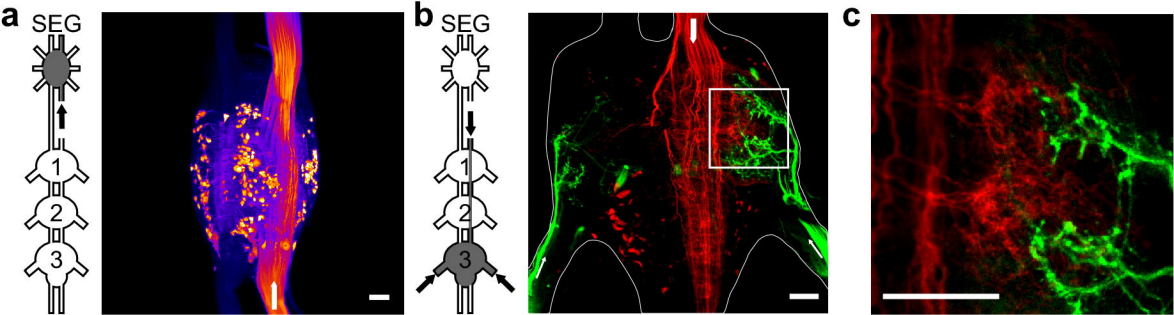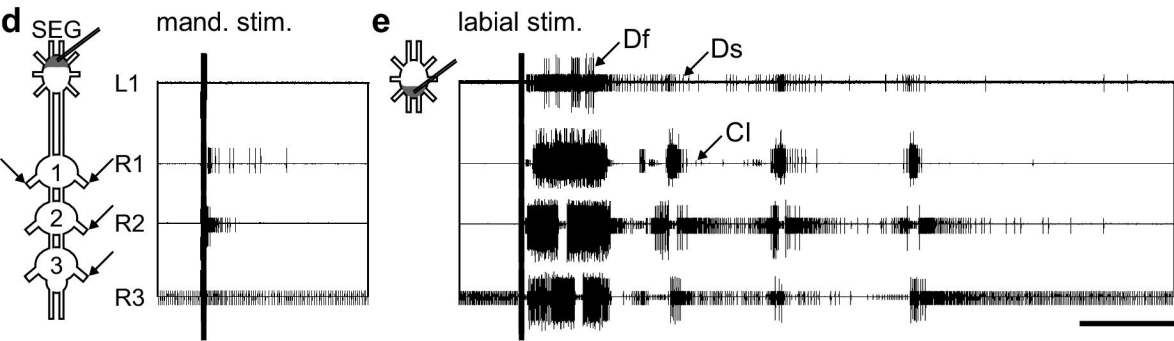

**a**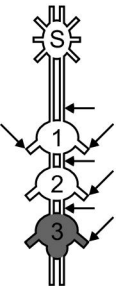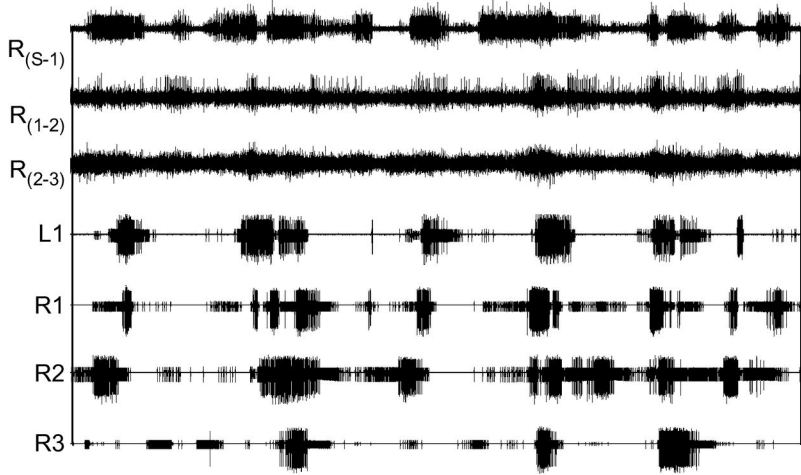**b**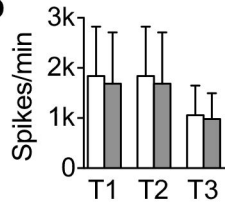**c**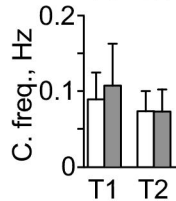

with SEG   
 without SEG

$n = 16$ 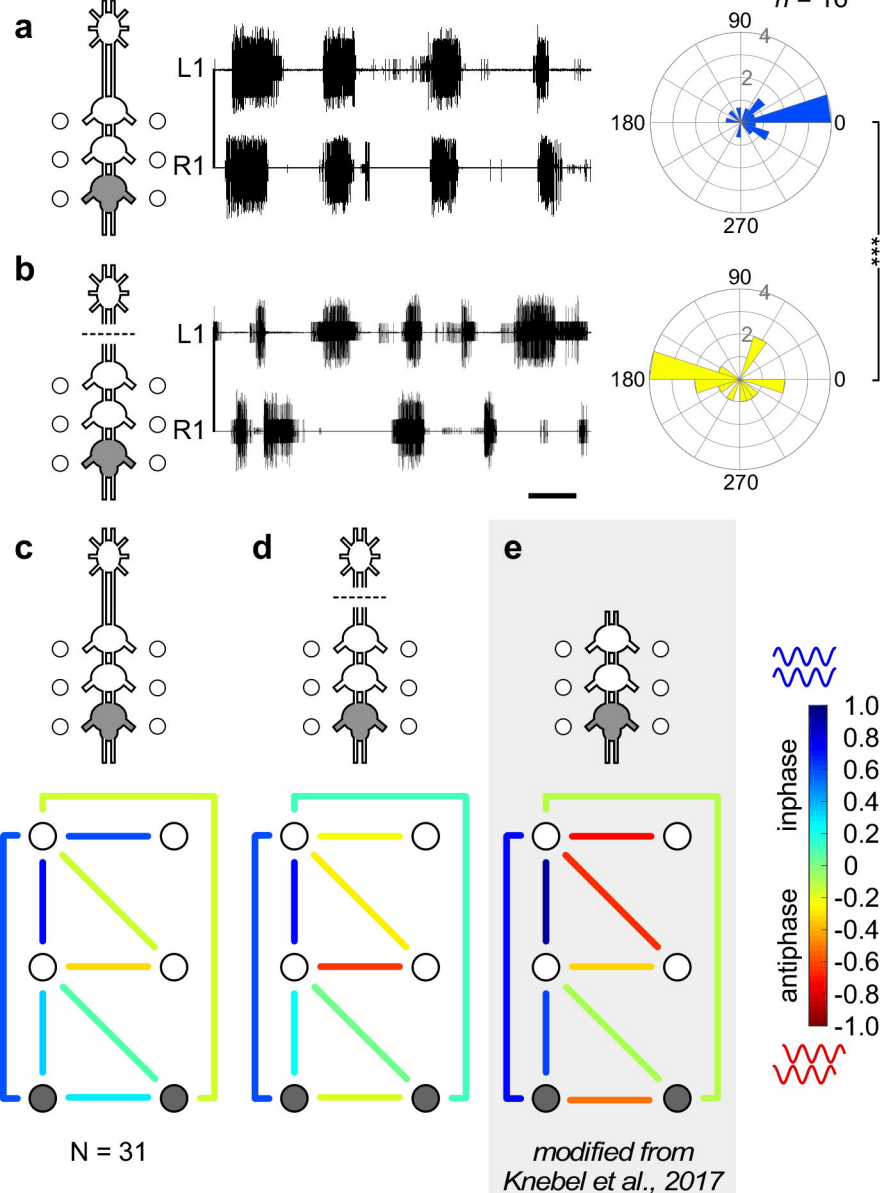

Source: https://www.biorxiv.org/content/10.1101/226167v1.full.pdf
